# Supplementary material
Source: PubMed Central journal article supplement (PMC4069966)
Supplement: ijcep0007-2729-f4.pdf [file ijcep0007-2729-f4.pdf]

## Determinants for irinotecan sensitivity/resistance in CRC cell lines

**Supplementary Table 1.** Primers for qPCR validation

| Gene    | Forward                 | Reverse                  |
|---------|-------------------------|--------------------------|
| Actb    | CACCATGTACCCTGGCATT     | GTACTTGCGCTCAGGAGGAG     |
| ABR     | CAAAGTGAAAGGTCCAAGG     | ATGGGCTTGTAGAGCAGAGC     |
| ARHGEF7 | GCCTGGATAAATACCCTACGC   | GGATGGCTTCCGTCAGGAT      |
| CDC20   | GTGGATTGGAGTTCTGGGAATG  | AGAGCTTGCACTCCACAGGTACA  |
| CITED2  | TCGTTTTTGTAGCCTTGACATTC | AACAACGAAAAAGACCAAGTTAGC |
| CTNNA1  | AAAGCCAGACAAGCCTGACTCT  | AGCAAACCCAGCTTAAGTCCAA   |
| FZD7    | GCGATGTGAATCGTCAAAGGT   | CTCGGAGCCGGGAGAAAC       |
| RNMT    | CTTGTCATTTGGGTTATCTCAAG | CTGGATTTGGCCTCTATTTTGC   |
